# 1 Mechanisms of biodiversity between *Campylobacter* 2 sequence types in a flock of broiler-breeder 3 chickens.

4 Thomas Rawson<sup>1,\*</sup>, Frances M. Colles<sup>2,4</sup>, J. Christopher D. Terry<sup>3</sup>, and Michael B.  
5 Bonsall<sup>1</sup>

6 <sup>1</sup>Mathematical Ecology Research Group, University of Oxford, Department of Zoology, Oxford, OX1 3PS, U.K.

7 <sup>2</sup>Peter Medawar Building for Pathogen Research, Department of Zoology, University of Oxford, South Parks Road,  
8 OX1 3SY

9 <sup>3</sup>School of Biological and Chemical Sciences, Queen Mary University of London, E1 4NS

10 <sup>4</sup>NIHR Health Protection Research Unit in Gastrointestinal Infections, University of Oxford, Oxford, UK

11 \*thomas.rawson@zoo.ox.ac.uk

## 12 ABSTRACT

A long-term study of *Campylobacter* sequence types was used to investigate the competitive framework of the *Campylobacter* metacommunity, and understand how multiple sequence types simultaneously co-occur in a flock of chickens. A combination of matrix and patch-occupancy models were used to estimate parameters describing the competition, transmission, and mortality of each sequence type. It was found that *Campylobacter* sequence types form a strong hierarchical framework within a flock of chickens, and occupied a broad spectrum of transmission-mortality trade-offs. Upon further investigation of how biodiversity is thus maintained within the flock, it was found that the demographic capabilities of *Campylobacter*, such as mortality and transmission, could not explain the broad biodiversity of sequence types seen, suggesting that external factors such as host-bird health and seasonality are important elements in maintaining biodiversity of *Campylobacter* sequence types.

## 14 Introduction

15 *Campylobacter* are one of the most frequent causes of food poisoning in the UK<sup>1,2</sup>, presenting an estimated £50 million  
16 direct economic burden to the UK<sup>3</sup>. The most commonly identified route of transmission to humans is via poultry meat<sup>4</sup>,  
17 with seventy three percent of UK supermarket chicken carcasses shown to carry the bacteria<sup>5</sup>. Whereas some foodborne  
18 pathogens, such as *Salmonella*, have been shown to proliferate primarily at the slaughterhouse<sup>6</sup>, *Campylobacter* instead emerge  
19 and spread rapidly at the farm level<sup>7,8</sup>. As a result, limiting the spread of *Campylobacter* within poultry farms has been one  
20 of the primary goals of the Food Standards Agency (FSA) across the last ten years<sup>9</sup>, where attempts to-date have focused

21 on biosecurity measures<sup>10,11</sup>, such as employing anti-bacterial ‘boot dips’ at the entrance to chicken houses, and greater  
22 stress placed on farmers to practise consistent hand-washing and facility cleaning. Since *Campylobacter* have been shown  
23 to spread from a single bird, to an entire flock, in as little as one week<sup>12</sup>, the thinking behind such prevention methods is to  
24 minimise the chance of the bacteria entering the flock in the first instance. Such measures have proved largely ineffective<sup>13–15</sup>,  
25 prompting calls for greater study into the ecology of this microbe<sup>11,16</sup>, in the hope of gaining insight into how it can be controlled.

26  
27 Different strains of *Campylobacter* are commonly categorised by sequence type (ST); genotyping samples by multi-locus  
28 sequence typing (MLST) of seven house-keeping genes<sup>17,18</sup>. Broiler flocks (birds grown for their meat) are grown for only a  
29 short time, ranging from roughly five weeks for standard flocks, to 12 weeks for organic flocks<sup>19</sup>. Yet despite this short window  
30 of time available for *Campylobacter* to colonise a flock, multiple STs are commonly observed simultaneously within a broiler  
31 flock<sup>20–22</sup>. For multiple STs to co-occur within a flock for several weeks implies the presence of regulatory mechanisms driving  
32 the sustained biodiversity within the flock, that have not yet been identified, let alone studied in depth.

33  
34 Understanding the inter-strain competition mechanisms amongst different strains of *Campylobacter* can both aid under-  
35 standing of the host-pathogen relationship, but also presents new opportunities in disease control. Understanding how certain  
36 STs may be excluded from colonising a flock by pre-established STs creates the opportunity for manipulation of these dynamics  
37 to reduce the incidence of certain STs. Strains of *Campylobacter* are known to vary in their pathogenic potential<sup>23</sup>, with some  
38 strains particularly effective at cell invasion<sup>24</sup>. Introducing competitively superior strains into a transmission source presents a  
39 way to ensure that particularly pathogenic strains are unable to establish via competitive exclusion, as has been demonstrated in  
40 experimental studies<sup>25</sup>. Alternatively, an understanding of these competitive frameworks presents the possibility for the use of  
41 live vaccine candidates, whereby bacterial strains that have been weakened can be used to trigger an immune response and  
42 limit pathogenic strains<sup>26</sup>. While promising results in such vaccine candidates have begun to appear<sup>27</sup>, reliable effectiveness  
43 of these approaches requires knowledge of the underlying population dynamics. As of yet, such dynamics are not properly  
44 understood<sup>28</sup>.

45  
46 Understanding of these mechanisms is further exacerbated due to the fact that the exact route of entry into the flock is  
47 still uncertain. While it is generally considered that horizontal transmission is the most likely source of flock infections<sup>29</sup>,  
48 with STs carrying over from other locations on a farm, there still exists evidence of some infections caused due to vertical  
49 transmission<sup>30</sup> and wild bird crossover<sup>31</sup>. The possibility of multiple points of entry for *Campylobacter* to enter a flock  
50 would explain the inability for improved biosecurity alone to reduce outbreak incidence, and may even suggest that stopping  
51 colonisation outright may be a fruitless endeavour, further supporting the need to utilise the manipulation of competitive  
52 hierarchies within the host microbiome; if the bacteria cannot be kept out of the farms, perhaps it can yet be kept out of the  
53 birds.

54

55 Investigations into the varying prevalence of specific STs have shown, experimentally<sup>32</sup> and numerically<sup>33</sup>, that a multi-  
56 tude of STs can be isolated from a chicken at any given time, and yet within this pattern of co-occurrence only one specific  
57 ST will usually be seen to dominate the gut, being isolated in far greater proportions than its co-colonisers. Through this  
58 mechanism, a diverse mix of STs can exist in this way within a flock of many chickens, each carrying their own cohort of STs,  
59 and each with their own resident dominant strain. This observation constitutes a metacommunity<sup>34</sup> of STs. A metacommunity  
60 is defined as a system where small communities interact with one-another, and influencing the dynamics within each individual  
61 community. In our instances, the competing STs within a single host chicken can be thought of as a community, with multiple  
62 STs competing for dominance within one chicken, yet the dynamics within each individual chicken influence neighbouring  
63 chickens, resulting in a level of flock-wide dynamics as well. By utilising various mathematical frameworks from the wider  
64 ecological literature, we can begin to uncover how STs can co-exist within the flock, and to then ascertain what dynamic  
65 properties cause some newly introduced STs to die out, and others to persist.

66

67 To investigate this dynamic behaviour, this study utilises two mathematical modeling approaches to query the data from  
68 a long-term broiler-breeder flock prevalence study by Colles et al. (2015)<sup>35</sup>, which reports the STs isolated from individual birds  
69 within a flock across a year. A competition matrix model, such as that outlined by Ulrich et al. (2014)<sup>36</sup>, is used to estimate a  
70 global competition matrix, detailing the competitive outcomes of pairwise competition between STs. This matrix quantifies  
71 the likelihood of specific competitive outcomes, namely if some STs will always outcompete some other STs, or whether  
72 such competitive outcomes can have unpredictable results. More importantly, they also provide insight into the competitive  
73 hierarchy seen within the broiler microbiome, whether that be a highly structured hierarchy, whereby dominant STs will  
74 always out-compete lesser-able STs in a gradually decreasing order of competitive advantages, or perhaps instead a system of  
75 intransitive competition. Intransitive competition, or ‘rock-paper-scissors’ competition, instead is defined as a system whereby  
76 loops are observed in the rank of competitive outcomes, for example if ST A outcompetes ST B, ST B outcompetes ST C,  
77 and ST C then outcompetes ST A<sup>37</sup>. We refer to this cyclic relationship as an intransitive triad. In such a system, there can be  
78 frequent turnover of competing organisms, as no one entity is necessarily globally superior. Intransitive competition has been  
79 shown to have far-reaching implications for ecological stability and biodiversity, enabling species coexistence<sup>38</sup>, promoting  
80 biodiversity<sup>39</sup>, and enabling species cooperation<sup>40</sup>.

81

82 Building on this, we then use the estimated competition matrix within a discrete-time patch-occupancy model to simu-  
83 late and explore the broader dynamics of how STs move between birds in a flock, displace one another, and capitalise on the  
84 niches presented by uncolonised birds. Patch-occupancy models simplify a system to a series of ‘patches’, be it spatial units or,  
85 in our case, individual chickens, where each patch can be occupied by only one organism at a time, in our case, the dominant  
86 ST of *Campylobacter*. The turnover in occupation by different organisms is captured by a series of probabilistic transition

87 mechanisms, which have had great success in demonstrating persistence within metacommunities<sup>41</sup>, due to minimising the  
88 assumptions placed upon the population dynamics of the system. The mechanisms that allow for sustained biodiversity in  
89 metapopulation models have been shown to primarily be the demographic factors of transmission and mortality of competing  
90 species<sup>42,43</sup>. i.e. how well a bacteria can invade a host, and how well it can remain there. In our case, we consider transmission  
91 as a measure of how many subsequent chickens will likely be challenged by the established ST in a host bird in the following  
92 timestep, the outcome of such a challenge is then decided by the previously estimated competition matrix. Bacterial mortality  
93 meanwhile is considered as the probability that a dominant ST will die out in the subsequent timestep, leaving the host bird  
94 susceptible to a new invading ST (not to be confused with bird mortality). By building a simulation of the system from which  
95 the data was gathered, we estimate these two specific parameters for each ST, and examine how these vary between STs and  
96 how they correlate with the observed frequency of each ST.

97

98 By presenting quantified estimates into the growth, spread, and competitive ability of each individual ST, we are able  
99 to provide insight into how STs of *Campylobacter* interact with one another, both within a host chicken, and within a flock as a  
100 whole.

## 101 **Methods**

### 102 **Data**

103 In the original study, a flock of 500 broiler breeders was monitored, with 200 birds labelled with leg-rings and monitored for a  
104 total of 51 weeks. Each week, cloacal swabs were taken from a random selection of 75 of the labeled birds, and tested for the  
105 presence of *Campylobacter* through standard culture methods. Positive samples were then genotyped (MLST), enabling the ST  
106 and species of the *Campylobacter* isolate to be specified. Note that, while multiple STs can occupy a host-bird simultaneously,  
107 it is frequently observed, experimentally<sup>32</sup> and theoretically<sup>33</sup>, that a single ST will broadly dominate the gut at any given time.  
108 Hence the sole ST recorded from a positive bird is a reflection of which STs are most dominantly expressed at that timepoint.  
109 Furthermore, these dominant STs in a host bird will dominate for roughly a week before being replaced by a competitor<sup>33</sup>.  
110 39 distinct STs of varying prevalence were observed across the year within the flock, 25 of *Campylobacter jejuni* and 14 of  
111 *Campylobacter coli*. 19 of these STs appear very rarely, with less than ten total appearances in the data. Due to this limited  
112 number of data, meaningful conclusions as to their competitive abilities cannot be given, and as such we do not consider these  
113 STs in our analysis, considering only the 20 STs for which more than ten instances of occurrence were recorded in the data. An  
114 example layout of a small portion of this data is presented in Figure 1, and the total prevalence of STs over time is displayed  
115 in Figure 2. Negative samples are not shown in Figure 2, as this data is not used for the competition matrix model. Further  
116 experimental details can be found in the original publication<sup>35</sup>.

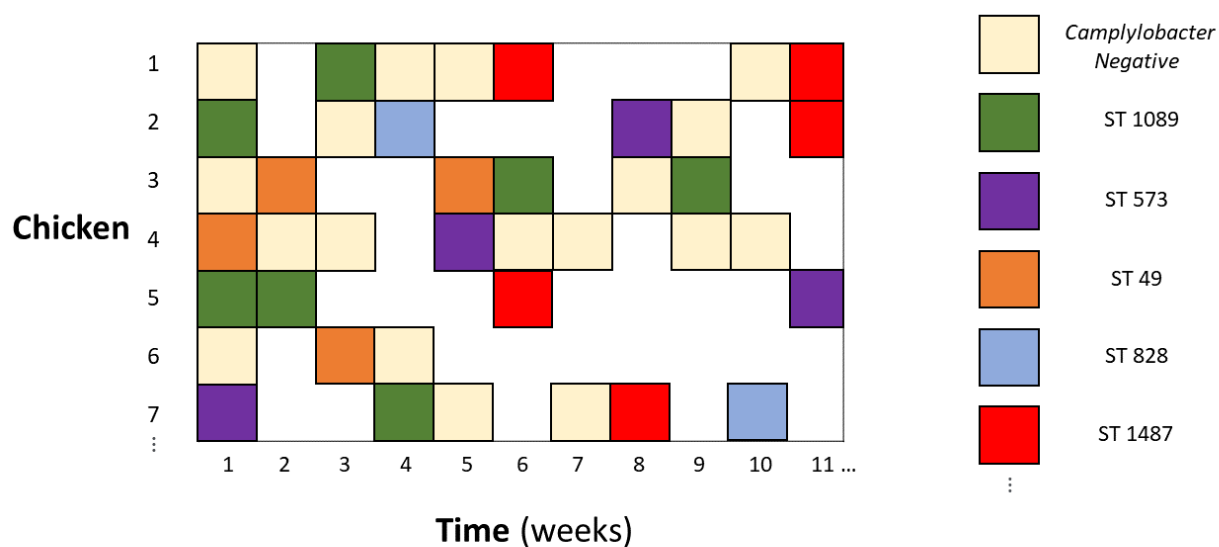

**Figure 1.** Example portion of the ST prevalence data. From a total flock of 500 broiler breeders, 200 were labelled with leg-rings. These 200 are captured in the rows of the data frame. Each week 75 of these birds were tested for the presence of *Campylobacter* for 51 weeks (columns). Birds were marked as either free from *Campylobacter* (marked in tan), or if found to be *Campylobacter* positive, the sequence type (ST) of the bacteria was recorded. Blank white spaces indicate where a bird was not tested for that particular week. The whole data set comprises 200 rows, 51 columns, and captures 39 distinct STs.

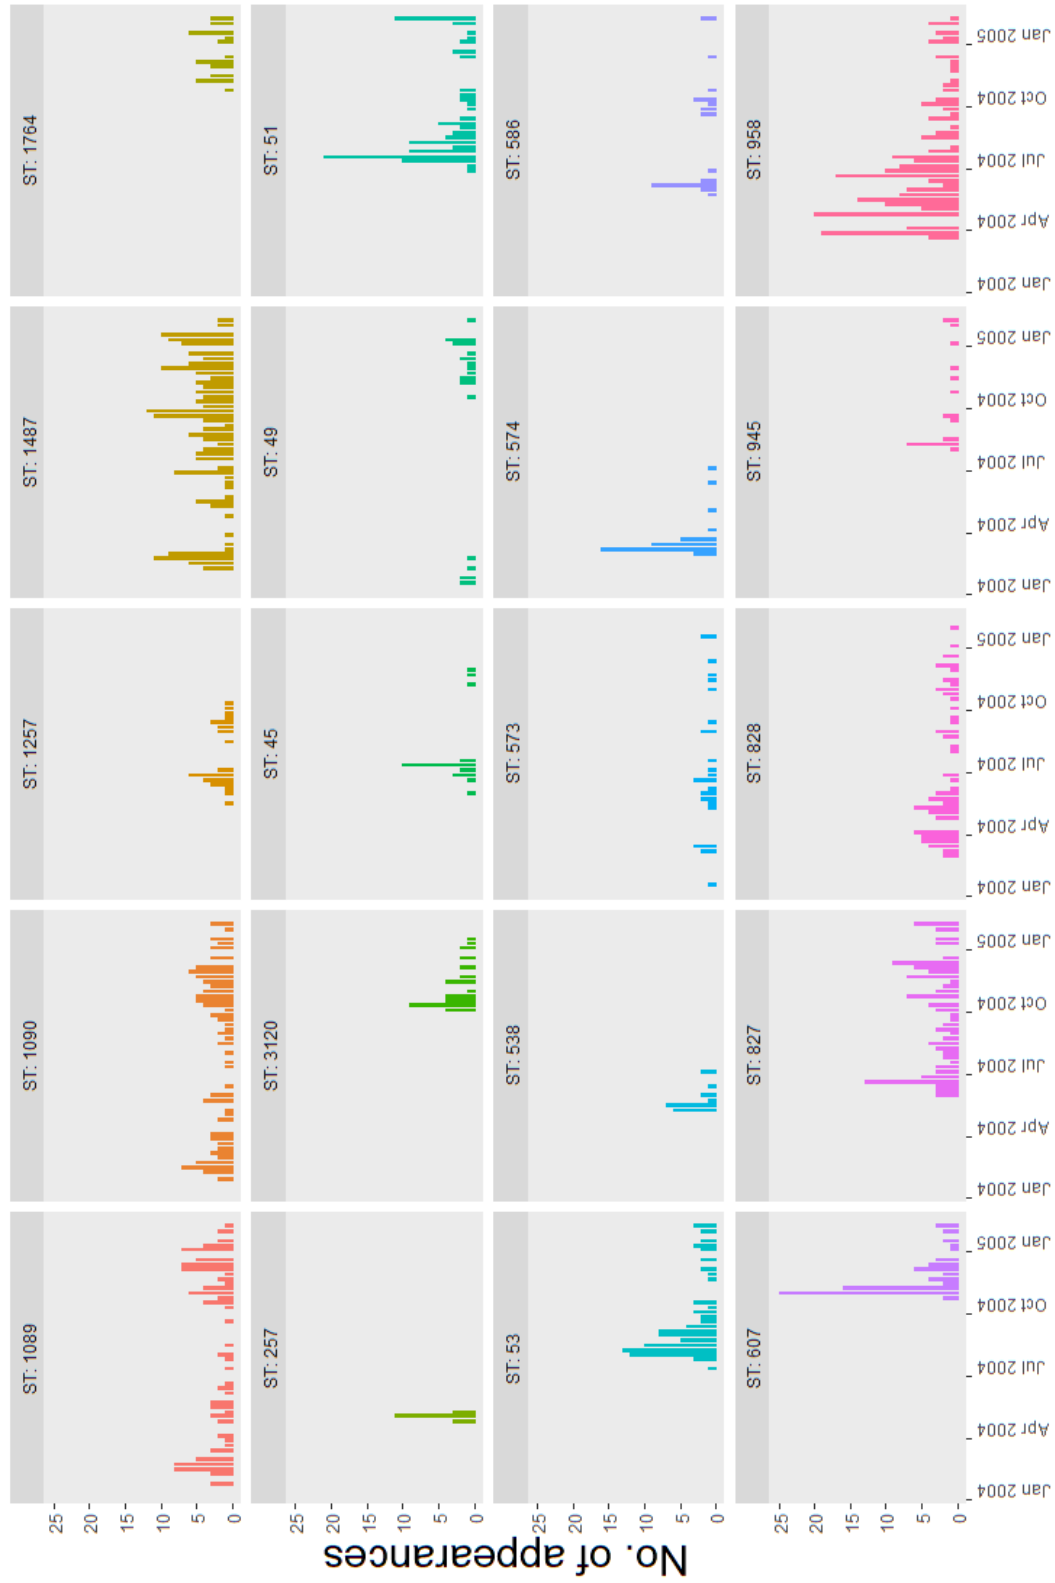

**Figure 2.** Histograms of ST prevalence across the study period reported in Colles et al. (2015)<sup>35</sup>. STs with less than 10 appearances are not displayed.

## 117 Competition Matrix

118 We first estimate a competition matrix, detailing all pairwise competition outcomes between all STs. Formally, we define  
119 that, for a system of  $n$  STs, the competition matrix,  $C$ , is an  $n \times n$  square matrix where element  $C_{i,j}$  represents the probability  
120 that ST  $i$  out-competes ST  $j$  in a pairwise competition. By definition, the diagonal elements of  $C$  are equal to 1, and  $C_{i,j} = 1 - C_{j,i}$ .

121  
122 By using the time-series abundance data of all STs throughout the flock, as shown in Figure 2, one may back-infer the  
123 pairwise competitive strengths between all STs within the flock. Based upon the methods outlined by Ulrich et al. (2014)<sup>36</sup>,  
124 this competition matrix may be estimated by first inferring a transition matrix,  $P$ : an  $n \times n$  square matrix where  $P_{i,j}$  repre-  
125 sents the probability that a chicken colonised by ST  $i$  is instead colonised by ST  $j$  in the next time period. Note that this  
126 matrix  $P$  is not the same as the competition matrix  $C$ , as the observed transitions could represent the result of multiple sequen-  
127 tial competitions between STs - the replacing ST has not only outcompeted the present occupant, but also all other incoming STs.

128  
129 To estimate this transition matrix,  $P$ , consider an  $n \times 51$  frequency matrix  $A$ , where element  $A_{i,t}$  denotes the number of  
130 chickens that ST  $i$  was isolated from at time  $t$ , and where  $n$  is the number of distinct STs. This matrix is directly built from our  
131 data, where element  $A_{i,t}$  can be seen as the ‘No. of appearances’ of ST  $i$  in week  $t$  from Figure 2. This frequency matrix is then  
132 related to our transition matrix,  $P$ , via the equation;

$$PA_t = A_{t+1} \quad (1)$$

133 where  $A_t$  is a column vector of  $n$  elements, reporting the abundance of all STs at time  $t$ . This provides a method by  
134 which to estimate  $P$  by choosing the matrix  $P$  that best fits equation (1). Homogeneous mixing of STs is assumed, however,  
135 another assumption is made in equation (1) that all STs are present and are capable of appearing at each time point. This is not  
136 representative of biological reality. We see from Figure 2 that some STs do not appear in the flock until later in the experiment,  
137 and while it could plausibly be being out-competed in every prior instance, it is more plausible that the ST has simply not yet  
138 infected the flock. As such, we adapt equation (1) by also implementing a binary-filled ‘presence’ matrix  $Z$ , an  $n \times 51$  matrix,  
139 where element  $Z_{i,j}$  is either 0 or 1, denoting whether or not ST  $i$  is present in the flock at time  $j$ . i.e. when a ST is not observed  
140 within a flock in a particular week, we do not consider its impact on that week’s transition dynamics.

141  
142 If ST  $i$  is isolated in the data at time  $t$ , we mark it as present in matrix  $Z$  for times  $t$  through to  $t + 3$ , to account for the  
143 possibility of a ST being reduced to low levels, not captured in the data. This three week window was determined from our  
144 earlier numerical simulations<sup>33</sup>, showing the average duration for which a low-level “non-dominant” ST might persist within a

145 host. We rewrite equation (1) as:

$$(PA_t) \odot Z_{t+1} = A_{t+1} \quad (2)$$

146 where  $Z_{t+1}$  is the  $(t+1)^{\text{th}}$  column of  $Z$ , and  $\odot$  is the Hadamard (element-wise) product. In essence,  $Z$  simply acts as  
 147 a switching mechanism, to switch off the possibility of transitions to a ST that has not yet emerged. This approach carries  
 148 multiple benefits. Primarily, the transition matrix now represents the transition probabilities for a flock where all STs are  
 149 present simultaneously. This inference allows more of the dataset to be utilised, without having to divide our experimental data  
 150 into multiple regions of different sized matrix calculations. A possible limitation to this approach is that it allows inference of  
 151 competitive outcomes between STs that do not appear at the same time in the original dataset. i.e. it can infer based on the  
 152 growth abilities of a ST at a later time how it would fare against a ST from an earlier time. While this inference is useful, these  
 153 limited instances are not experimentally verifiable. As such, we do not display these few “assumed” competitive strengths in  
 154 our results, to avoid confusion.

155

156 Once the best fitting  $P$  to equation (2) has been found, we may use this  $P$  to estimate the associated competition matrix  
 157  $C$ . Ulrich et al. (2014)<sup>36</sup> presents such a methodology whereby, assuming homogeneous mixing, the transition matrix  $P$  and the  
 158 competition matrix  $C$  are linked by the relationship:

$$P_{i,j} = P(1, \dots, n)[j \rightarrow i] = \frac{1}{n-1}C_{i,j} + \frac{1}{n-1} \sum_{k=1, k \neq i, j}^n C_{j,k}P(1, \dots, k-1, k+1, \dots, n)[j \rightarrow i] \quad (3)$$

159 for  $i \neq j$ , and

$$P_{i,i} = \prod_{k=1, k \neq i}^n C_{i,k} \quad (4)$$

160 where the range of summation in (4) is calculated across the subset considered in the notation  $P(1, \dots, n)$ . Heuristically,  
 161 one considers the transition probabilities as the proportional outcomes of all possible competitive interactions. In a four-species  
 162 system, equations (3) and (4) would define:

$$P_{i,j} = \frac{1}{3}C_{i,j} + \frac{1}{3} \left( \frac{1}{2}C_{i,j}C_{j,k} + \frac{1}{2}C_{i,j}C_{j,k}C_{j,l} \right) + \frac{1}{3} \left( \frac{1}{2}C_{i,j}C_{j,l} + \frac{1}{2}C_{i,j}C_{j,l}C_{j,k} \right).$$

163 In small systems, the probability of successful transition for each ST could be directly calculated as the proportional



164 outcome of all possible competitive interactions as given in equations (3) and (4). However, for our system of 20 STs this is  
165 computationally impossible, as the size of equation (3) will rapidly balloon for such a large system. Instead we therefore used  
166 the approximation approach of Ulrich et al. (2014)<sup>36</sup>:

$$P_{i,j} \approx \frac{1}{m-1} \sum_{k=0}^{n-2} \left( \frac{\prod_{l=1}^n C_{j,l}}{C_{j,j} C_{j,i}} \right)^{\frac{k}{n-2}}. \quad (5)$$

167 This approximation was found to estimate a randomly drawn  $20 \times 20$  test competition matrix with a mean value error  $< 0.001$ .

168

169 The above methodology allows us to choose a trial competition matrix,  $C$ , convert this to a transition matrix,  $P$  via equation (5),  
170 and then evaluate how well this transition matrix simulates the observed data,  $A$ , via equation (2). All that is required now is an  
171 approach by which to find the “best” competition matrix  $C$ . As such, we estimate the competition matrix  $C$  using the above  
172 equations within a Bayesian framework, using the Just Another Gibbs Sampler (JAGS) program<sup>44</sup>, a Markov chain Monte  
173 Carlo (MCMC) sampling program utilising Gibbs sampling. Specifically the model was called and analysed within R by using  
174 the `rjags` package<sup>45</sup>. We considered wide, uninformative, uniform priors on the elements of  $C$ . Convergence was considered  
175 well-achieved, with every element of  $C$ 's posterior distribution displaying a potential scale reduction factor (PSRF)  $< 1.03$ , and  
176 a Monte Carlo standard error (MCSE) less than 5% of the standard deviation of the sample. The code used is made available at  
177 <https://osf.io/3rd4e/>.

178

179 Lastly, we quantify the amount of intransitivity observed from the best-fit competition matrix  $C$ . While many metrics  
180 of measuring intransitivity have been proposed<sup>46</sup>, the most suitable is generally considered to be Kendall and Babington Smith's  
181  $d_s$ <sup>47</sup>; a measure of the proportion of three-species intransitive loops found within the competition matrix. i.e. we measure the  
182 number of cyclical intransitive triads seen in the competition matrix, and divide this by the total number of possible triads for a  
183 competition matrix of that size.

## 184 Patch-occupancy model

185 The estimated competition matrix gives insight into the interactions between different *Campylobacter* STs, however it cannot  
186 by itself answer our questions as to how biodiversity of STs is maintained within the flock. The previous metacommunity  
187 modelling studies of May & Nowak (1994)<sup>42</sup> and Hanksi & Gyllenberg (1997)<sup>43</sup> have demonstrated that persistence can be  
188 largely managed by differences between the colonising ability and mortality of competing organisms. As such, we estimate  
189 parameters describing the colonising ability and mortality for each of our 20 considered STs. Figure 2 shows that some STs  
190 occur with increased frequency compared to other present STs. For example, STs 1487 and 573 both seem to persist within  
191 the flock throughout the entire recorded experimental duration, and yet ST 573 is observed in far fewer birds throughout this  
192 time. We hypothesise that differences in the demographic parameters between these STs may explain the differences in the

193 underlying population dynamics.

194

195 A patch-occupancy model was designed to simulate the experimental data as closely as possible. In this instance, the  
196 patches considered are the 500 chickens that make up the flock, and the STs of *Campylobacter* present are the occupying  
197 entities.

198

199 A  $500 \times 51$  matrix is initialised, where each row denotes a specific chicken in a flock, and each column a time-point  
200 (a week), so as to replicate the data structure shown in Figure 1. Element  $(i, t)$  thus records which ST, if any, has colonised  
201 chicken  $i$  at time  $t$ . The first column is initialised to match the proportion of STs recorded in the first week of the dataset  
202 in Figure 2. Each time-step is then simulated in turn, to iteratively generate the subsequent 50 columns. In each timestep,  
203 each established ST may be removed for the following timestep with probability,  $\mu_i$ , the ST-specific mortality parameter that  
204 we seek to estimate. STs that persist to the next timestep then have the opportunity to infect other chickens. The number of  
205 other chickens that are challenged by this resident ST is drawn from a Poisson distribution,  $\text{Pois}(\lambda_i)$ , where  $\lambda_i$  is a ST-specific  
206 parameter. Borrowing from the parlance of the ecological literature, we refer to this parameter as the average ‘propagules  
207 released’ by ST  $i$ . If a challenged chicken is currently uncolonised by *Campylobacter*, they then become colonised by the  
208 invading ST. If a challenged chicken is currently colonised by a different ST, this is treated as a competitive event, whereby  
209 the winner of the pairwise competition will be the occupying ST for the following timestep, and the loser is removed. This  
210 outcome is decided by the probabilities estimated in our previous model, given by the matrix  $C$ .

211

212 When new STs appeared for the first time in the experimental data, they are directly introduced into the patch-occupancy model  
213 at the proportion and time-step they were first observed. One exception is made for ST 49, which was unobserved for so long in  
214 the experimental data, that two specific introduction events were allowed. Appendix 1 outlines the pseudo-code detailing this  
215 model structure. The model was programmed in R and the code is available at <https://osf.io/3rd4e/>.

216

217 Considering transition events on the weekly timescale provided in the original data is considered valid based upon theo-  
218 retical modelling work showing that dominant STs in a host bird will dominate for roughly one week before being replaced  
219 by a competitor<sup>33</sup>. Much like our previous model, this provides a framework whereby a trial solution of  $\mu_i$  and  $\lambda_i$  for each  
220 ST  $i$  can be used, and the resulting ST population dynamics can be compared against the population dynamics observed in  
221 the original data. We wish to find the values of  $\mu_i$  and  $\lambda_i$  that best capture the patterns seen in Figure 2. We score a trial  
222 solution by comparing the relative proportions of ST frequency at each time-step with the proportions shown in the original  
223 data. The specific iterative framework as outlined in Appendix 1 cannot be integrated into a Bayesian system, so we instead  
224 utilise machine learning techniques to seek the optimum solution.

225 We first find an estimate for the average parameter values across all STs to use as an initial trial solution for each individual

226 ST. We collapse the data to a binary state of either *Campylobacter*-positive or *Campylobacter*-negative, and use simulated  
227 annealing to find the average  $\mu$  and  $\lambda$  values that best simulate the data, using a scoring function defined by the absolute  
228 difference between the infection proportions in every column and every row between the model data and experimental data.  
229 This is so that the algorithm selects the parameters that also capture the frequency with which chickens may transition from  
230 being *Campylobacter*-positive to *Campylobacter*-negative. This provided a best-fit solution of  $\mu = 0.7$ , and  $\lambda = 3.2$ . These  
231 values were then used as initialisation points for each ST-specific parameter set  $(\mu_i, \lambda_i)$ , which are then iteratively adapted using  
232 genetic algorithm approaches to find the best-fit solution.

233

234 Genetic algorithms, so named for their inspiration by natural selection, generate “mutations” of the initial trial solutions, and the  
235 resulting mutations which best describe the data will in turn inform the next generation of trial solutions. A genetic algorithm of  
236 population size 200 was run for 100 iterations, using the  $(0.7, 3.2)$  estimate as a suggested population element for each specific  
237 ST.

## 238 Results

239 Figure 3 shows the pair-wise competition values for all STs. STs that do not naturally co-occur during the experiment have  
240 been represented with a grey-box, as meaningful conclusions as to their competitive interactions cannot be drawn. The matrix  
241 has been re-ordered to maximise the number of values  $>0.5$  in the upper-diagonal, thus showing the identified hierarchy.

242

243 A strong hierarchical structure can be observed, with STs at the top of the matrix mostly outcompeting all STs below  
244 them. Some intransitive loops can be seen within the matrix however, for example ST 607, which is able to out-compete some  
245 STs higher up the hierarchy. When uniformly sampling the missing values of the matrix shown in Figure 3, an average of 125  
246 intransitive triads are recorded for the competition network, compared to a hypothetical maximum of 330 for a (complete)  
247  $20 \times 20$  matrix, resulting in an intransitivity score of  $d_s = 0.379$  (Kendall and Babington Smith’s  $d_s$ <sup>47</sup>). In comparison, on  
248 sampling 100,000 random  $20 \times 20$  competition matrices, the lowest number of intransitive triads generated was 196, hence our  
249 observation of only 125 triads supports a system of significant hierarchical competition.

250

251 The competition matrix shown in Figure 3 is then utilised within the patch-occupancy model to estimate ST-specific transmission  
252 and mortality parameters. These parameters are displayed below in Figure 4. Mortality ( $\mu$ ) we define as the probability that an  
253 established ST will die-out from its host bird naturally from one week to the next. To capture ST-specific transmission effects  
254 we report the average propagules released ( $\lambda$ ), the average number of other chickens that an occupying ST will challenge for  
255 the following timestep, with the outcome of these challenges decided by the above competition matrix.

256

257 The positive logarithmic trend ( $p < 0.0001$ ) shows a relationship whereby STs with a higher mortality (they die out more

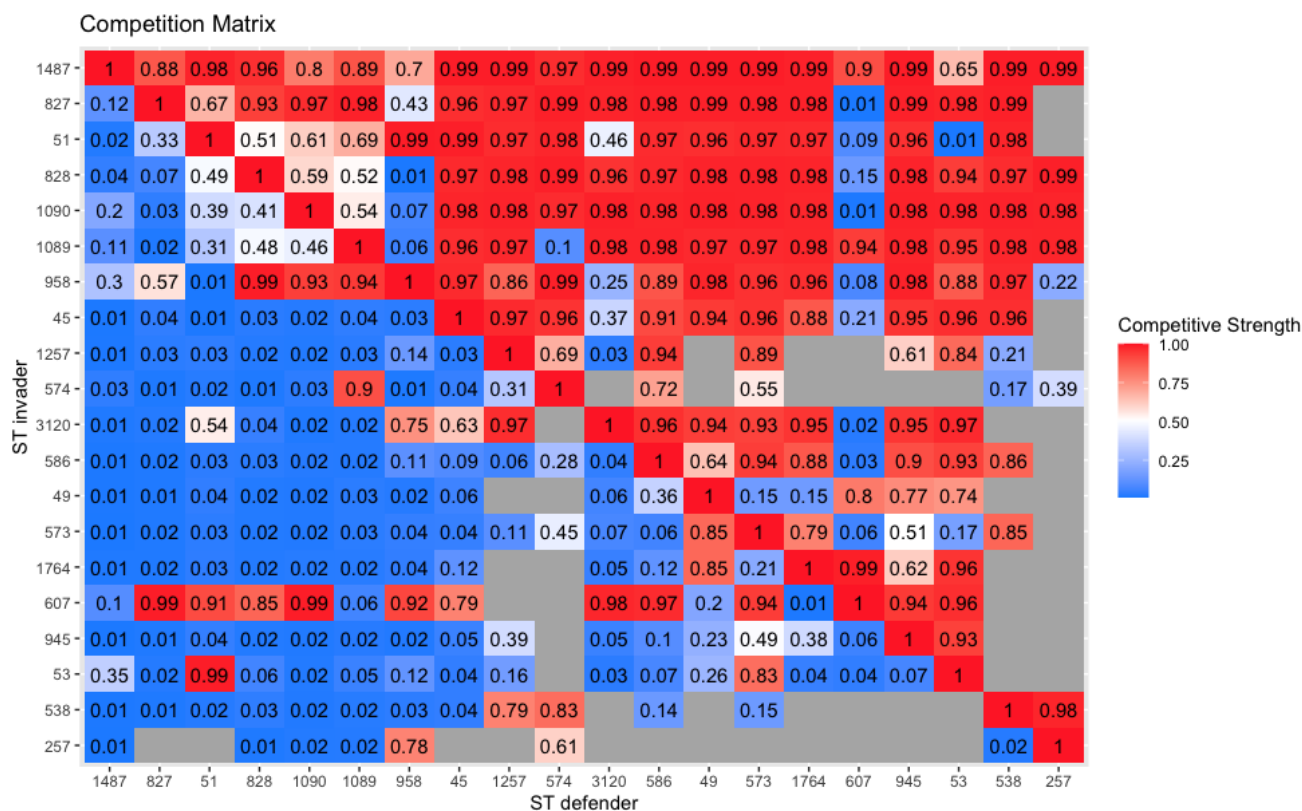

**Figure 3.** Matrix of pairwise competition strengths between *Campylobacter* STs. Element  $(i, j)$  depicts the probability that ST  $i$  out-competes ST  $j$  in a pairwise competition. Empty grey boxes depict cases where two STs do not coexist during the experiment, thus their competitive relationship cannot be estimated. Rows are ordered to maximise the number of values  $>0.5$  above the diagonal. The structure reveals a strong competitive hierarchy, with the strongest competitors at the top of the matrix.

258 frequently) can maintain their presence in the flock by being able to colonise more chickens.

## 259 Discussion

260 Here we have investigated the ecological drivers maintaining *Campylobacter* diversity within chicken flocks. By quantifying  
 261 competition, transmission, and mortality parameters through two mathematical frameworks, we have highlighted the demo-  
 262 graphic differences between *Campylobacter* sequence types, and shown that the metacommunity of STs operates within a strict  
 263 competitive hierarchy, with some STs capable of outcompeting other STs, and hence replacing them as the dominant strain  
 264 within host birds.

265  
 266 The competition matrix shown in Figure 3 effectively disproves the hypothesis that ST diversity may have been main-  
 267 tained by a system of intransitive competition, as very few intransitive triads were found within the system. Intransitive loops  
 268 have been shown to theoretically support coexistence of many competing organisms, dependent on growth rate differences  
 269 and intransitive cycle length<sup>48</sup>, and such effects have been demonstrated in small plant communities<sup>49</sup>. Despite the wealth  
 270 of theoretical work surrounding the impact of intransitive competition, real-world evidence of such systems is lacking. An

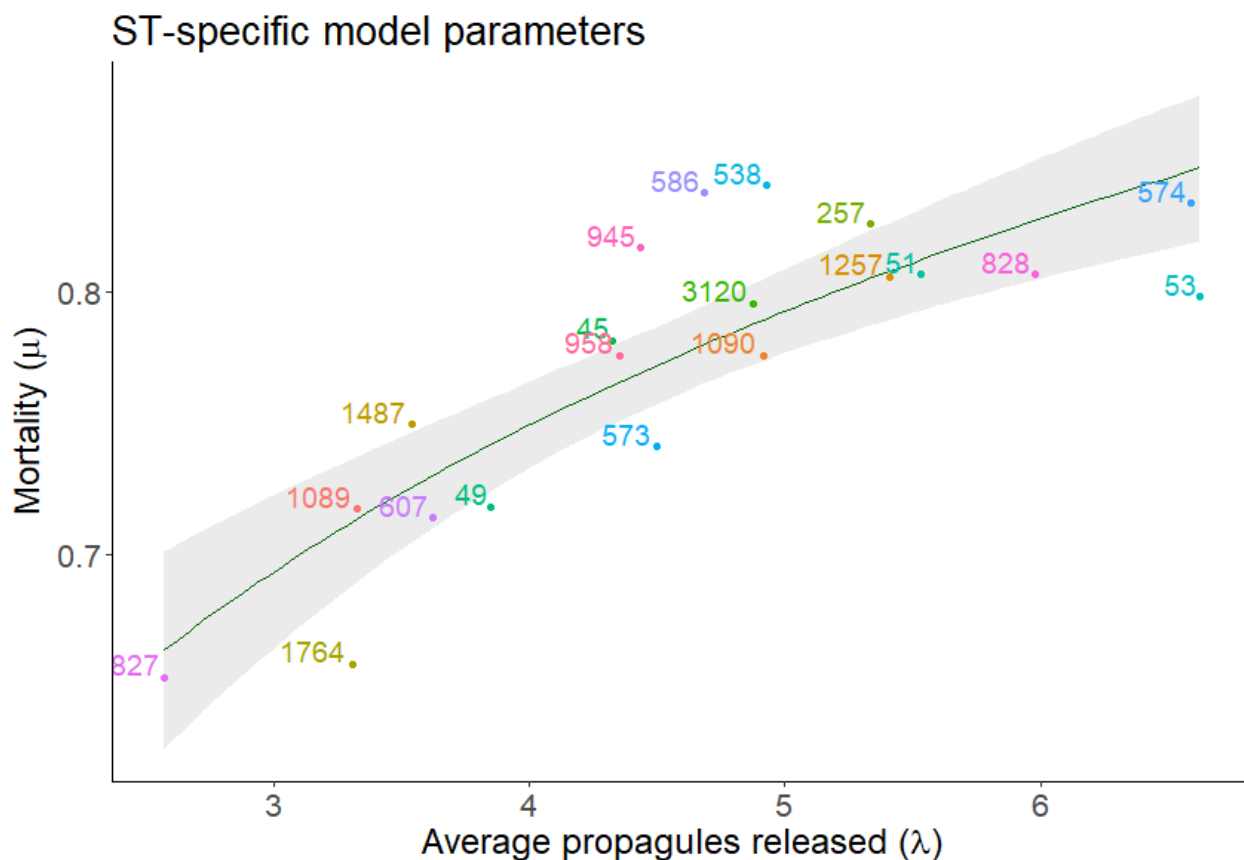

**Figure 4.** ST-specific model parameters for patch-occupancy model. Mortality ( $\mu$ ) depicts the probability that a ST dies out from one time-point (a week) to the next. If the ST does not vacate a host, it releases propagules that challenge other host chickens. The average number of chickens challenged ( $\lambda$ ) is a model parameter depicted on the  $x$ -axis. The green line displays the statistically significant ( $p < 0.0001$ ) logarithmic regression between the two variables. We see a positive trend whereby higher mortality is compensated by a greater number of propagules being released.

271 experimental study searching for such effects across five different taxonomic groups by Soliveres et al. (2018)<sup>50</sup> was unable to  
272 find strong evidence of intransitivity in any of their studies other than experiments with mosses, and found zero intransitive  
273 triads in their bacterial experiment. As such, our inability to identify clear signs of intransitivity is unsurprising. Only STs 53,  
274 607, and 3120 showed clear evidence of being able to out-compete STs higher in the hierarchy. All three of these STs appear to  
275 have remained prevalent in the flock from their point of entry to the end of the experiment time, possibly suggesting that STs  
276 that are able to form an intransitive loop may be more capable of invading and persisting in the flock.

277

278 Within this competitive hierarchy, we also show that the magnitude of the respective competitive probabilities are rela-  
279 tively large. In the the upper diagonal of Figure 3 values are greater than 0.9, suggesting that the competitively superior STs  
280 not only outcompete a vast number of other STs, but that they outcompete these other STs decisively, winning competitive  
281 interactions over 90% of the time in most instances. This is in line with experimental studies into inter-strain competition, with  
282 El-Shibiny et al. (2007)<sup>51</sup> demonstrating how a strain of *Campylobacter* is not only able to outcompete a multitude of other

283 strains, but to do so repeatedly in multiple experiments.

284

285 This evidence of a clear competitive hierarchy further stresses how specific mechanisms must underpin the observed main-  
286 tenance of biodiversity of *Campylobacter* STs. Under such competitive conditions, biodiversity of a metacommunity has  
287 been shown to be feasibly maintained by trade-offs between transmission and mortality<sup>42,52–54</sup>. Under such a system, the  
288 co-occurrence of multiple STs can be explained by competitively strong STs displaying high mortality rates, namely that  
289 after replacing a resident ST, they naturally die out from the host quickly. Alternatively, their transmission ability may be  
290 compromised such that, although they may be very effective competitors, they are unable to proliferate as fast as other STs,  
291 and thus may not challenge a high number of other chickens from one week to the next. Likewise, a competitively weak ST,  
292 such as ST 53 in Figure 3, may not be able to withstand competition from incoming STs, but is able to persist in the flock by  
293 challenging a higher number of chickens each week (high number of propagules released), and surviving within these host  
294 birds for a longer period of time (low mortality). The patch-occupancy model presented was designed to specifically quantify  
295 these mortality and mean propagule release parameters, and are presented in Figure 4.

296

297 Figure 4 shows that all STs can be placed somewhere within a life-history trade-off. In general, STs displaying high  
298 mortality, may persist in the environment by releasing a higher number of average propagules, and vice-versa. May & Nowak  
299 (1994)<sup>42</sup> theoretically showed that for a newly emerging entity into a community to successfully invade a metacommunity, and  
300 to then persist, they need to fill a yet unrepresented area of this transmission-mortality spectrum. i.e. to persist, they need to  
301 have no close neighbours in the plot of Figure 4. This may be demonstrated by STs 827 and 53. Both STs can be seen from  
302 Figure 2 to appear within the flock mid-way through the time span, and to then successfully persist through to the end of the  
303 experiment. Both of these STs can also be seen from Figure 4 to be outliers on the transmission-mortality spectrum, with  
304 ST 827 having the lowest mortality of all observed STs, and ST 53 having the highest number of mean propagules released.  
305 As a further interesting contrast, competitive ability does not appear to have influenced this, as ST 53 is one of the weakest  
306 competitors in the metacommunity, and ST 827 is one of the strongest, as shown in Figure 3.

307

308 However, this mechanism alone has historically been unable to account for the vast amount of sustained biodiversity observed  
309 in nature. Building on the theoretical findings of May & Nowak (1994)<sup>42</sup>, Bonsall et al. (2004)<sup>53</sup> demonstrated that species  
310 within a hierarchical competition structure, competing for the same resource, may co-exist by clustering into ‘life-history  
311 guilds’. Competitively strong species may simultaneously co-exist by sharing similar demographic parameters. At the same  
312 time, competitively weaker species will also persist in the environment, by also sharing similar demographic capabilities with  
313 one another. Scheffer and van Nes (2006)<sup>54</sup> highlighted the same result, concluding that newly emergent species would only  
314 persist in the environment if either (i) they were significantly competitively superior to all existing species, or (ii) if they were  
315 similar enough to existing species, both competitively and demographically, so as to exist within this particular life-history

316 guild niche. Our results however do not show evidence of such ecological guilds.

317

318 Figure 4 shows that, while STs do form a life-history trade-off, STs appear in a broadly even distribution across this mortality-  
319 propagule trade-off. Furthermore, some STs that appear to be demographically similar vary greatly in their competitive ability  
320 and respective population dynamics. From Figure 2, we can broadly delineate STs by four distinct dynamic profiles: a ST  
321 may either persist in a flock or die out, and it may exist at high-frequency or low-frequency. It was assumed that one could  
322 characterise these four distinct dynamic profiles by their competition, average propagule release, and mortality parameters,  
323 and yet no such pattern has been found in this study. For example, the STs 257, 574, 45, and 1257, could all be characterised  
324 as appearing in high frequency, before then dying-out. Yet despite these similar dynamical behaviours, all STs place broadly  
325 across the competition-propagule-mortality spectrum, with no common trends in their placement. Likewise, STs 586, 573, and  
326 945 could all be categorised as persisting in the flock, though recovered at low frequency, and yet all three STs are found in  
327 broadly different placements in Figures 3 and 4. In general, STs that appear in high frequency appear to correlate with higher  
328 competitive potential in Figure 3, though no such trend can be associated with persistence.

329

330 Since these STs do not demonstrate the guild-assemblage ‘clumping’ structure in Figure 4 (shown by Bonsall et al. (2004)<sup>53</sup>  
331 to be necessary for biodiversity maintenance in this instance), it suggests that some other mechanism must be enabling the  
332 co-occurrence and persistence of *Campylobacter* STs. Based upon the broader wealth of investigations into *Campylobac-*  
333 *ter* dynamics, we can posit three potential hypotheses driving these clearly seen differences in population dynamics between STs:

334

335 (i) Host-bird variability. It has been shown in numerous patch-occupancy systems that patch quality (meaning that some  
336 patches are ‘easier’ to colonise than others) can have a tremendous impact on the overall population dynamics, having even  
337 greater impact than differences between how patches are connected<sup>55,56</sup>. Yu & Wilson (2001)<sup>57</sup> theoretically showed that while  
338 differences in life-history trade-offs were necessary for co-existence, significant heterogeneity in patch quality or density was  
339 necessary to support a large number of species. Such patch variation also made it possible for newly emergent species to persist  
340 even if the species was inferior in both competitive and colonisation ability. In our context, variation in patch quality and  
341 density would translate to host birds varying in their response to bacterial challenge, with some chickens ‘easier’ to colonise  
342 than others. Indeed, through Bayesian transition models we have shown using this same data set in Rawson et al. (2020)<sup>58</sup> that  
343 a flock contains a mixture of birds that are highly resilient to bacterial challenge, and highly susceptible birds that operate as  
344 ‘super shedders’. These super shedders are consistently being colonised by a variety of *Campylobacter* STs with high turnover.  
345 Poor individual bird health and welfare has been previously shown to correlate with a reduced immune response, with measures  
346 such as stocking density<sup>59,60</sup>, food withdrawal, and heat stress<sup>61</sup> all contributing to increased *Campylobacter* colonisation. Yu  
347 & Wilson’s (2001)<sup>57</sup> study directly shows that the host-bird variation seen in Rawson et al. (2020)<sup>58</sup> removes the need for  
348 newly emerging STs to be sufficiently similar to persist in the flock. This further supports the idea that the proliferation of



349 *Campylobacter* in a flock is influenced primarily by the individual birds.

350

351 (ii) Seasonal variation. Broiler flock colonisation by *Campylobacter* has been well-documented to follow a seasonal trend<sup>62,63</sup>,  
352 with flocks more likely to become colonised in the warmer summer months than the winter. The data behind this modelling  
353 study was gathered over 51 weeks, January 2004 to January 2005, so would plausibly have been impacted by seasonal variation.  
354 The original study examining the impact of local environmental variables on the data set we have considered<sup>35</sup> (and subsequent  
355 Bayesian transition analyses<sup>58</sup>), were unable to identify any temporal trend within the total *Campylobacter* prevalence, however  
356 the *Campylobacter coli* STs did appear less frequently during the summer. It is thus plausible that seasonal variation may  
357 have impacted the population dynamics of the occupying STs in the flock via some yet-unidentified mechanism. An example  
358 of this may be seen by comparing the population dynamics of STs 53 and 574. Both STs occupy a similar placement in the  
359 propagule-mortality spectrum of Figure 4, and yet, despite ST 574 being more competitively able than ST 53, ST 574 does not  
360 persist in the flock, while ST 53 does. One possible explanation for this is that ST first appeared within the flock in July, while  
361 ST 574 appeared in February.

362

363 (iii) Stochasticity. While our patch-occupancy model is a probabilistic one, the mechanisms by which a metacommunity of  
364 *Campylobacter* STs persist is determined by a number of random events. The events of a ST first entering the flock, chickens  
365 ingesting colonised faeces, and of then establishing themselves within the microbiome all encompass a wide number of  
366 stochastic events which could change the resulting population dynamics. Coward et al. (2008)<sup>28</sup> showed that attempts to  
367 replicate population dynamics of *Campylobacter* within broilers were largely unsuccessful, even in the most simple cases of  
368 just two competing strains. They posited that this was likely due to “founder effects”, small variations in population level at first  
369 inoculation which could have large consequences for the flock-wide population dynamics. We have previously shown this  
370 effect through a series of stochastic differential equations in Rawson et al. (2019)<sup>33</sup>, whereby a variety of overall population  
371 dynamics can be observed dependent on stochastic events when the population of a *Campylobacter* ST is very low. Likewise,  
372 upon running the patch-occupancy model for the estimated parameters presented in the results, some STs would persist in  
373 some actualisations, but not others. Thus, attempting to characterise some dynamical profiles by mortality and transmission  
374 parameters, may not be possible as our experiment displays only one dynamic outcome of many possible ones.

375

376 One important caveat to this work must be stressed. Since broiler flocks are slaughtered anywhere from 5 to 11 weeks  
377 of age, longitudinal studies into the *Campylobacter* population dynamics are not possible, birds are not alive for long enough  
378 for us to observe long-term dynamics from which to extract parameter estimates. As such, this experimental data was gathered  
379 from a flock of broiler-breeders, the birds that lay the eggs that become broiler flocks. As we have discussed above, host bird  
380 factors may have significant implications for the overarching population dynamics of the microbiome, meaning that these  
381 estimated parameters could plausibly be different in commercial broiler flocks. Broiler and breeder flocks are kept under



382 slightly different housing conditions and diet provisions<sup>64</sup>, and breeder flocks have also been shown to shed smaller amounts of  
383 *Campylobacter* than commercial broilers<sup>65</sup>. Since this study has focused on investigating *Campylobacter*-specific factors, our  
384 conclusions remain relevant to commercial broiler flocks, namely that the population dynamics remain deeply susceptible to  
385 impact from a variety of factors, such as season and host bird health.

386

387 The primary finding of this work highlights how the life-history trade-offs we have identified fail to provide an explana-  
388 tion for the persistence and co-occurrence of multiple *Campylobacter* STs. This further supports the notion that suppressing and  
389 controlling outbreaks of *Campylobacter* cannot be achieved through bio-security alone, and reflects calls for a ‘One Health’<sup>66</sup>  
390 approach, whereby further understanding is needed of how *Campylobacter* and broilers interact and affect each other. We have  
391 shown that demographic advantages alone cannot determine which STs of *Campylobacter* will come to dominate a flock of  
392 chickens, and that it may instead come down to a ST being in the right place at the right time, or rather, the right chicken in the  
393 right season.

## 394 **Author contributions statement**

395 F.M.C. collected the data. T.R., J.C.D.T., and M.B.B. conceived the study. T.R. built the models and wrote all associated code.  
396 T.R. wrote the manuscript. F.M.C., J.C.D.T., and M.B.B. supervised the project. All authors aided in interpretation of results  
397 and reviewed the manuscript.

## 398 **Conflict of interest statement.**

399 The author declares that the research was conducted in the absence of any commercial or financial relationships that could be  
400 construed as a potential conflict of interest.

## 401 **Funding**

402 The work was supported through an Engineering and Physical Sciences Research Council (EPSRC) (<https://epsrc.ukri.org/>)  
403 Systems Biology studentship award (EP/G03706X/1) to TR.

## 404 **References**

- 405 **1.** Strachan, N. J. & Forbes, K. J. The growing uk epidemic of human campylobacteriosis. *The Lancet* **376**, 665–667 (2010).
- 406 **2.** Blaser, M. J. Epidemiologic and clinical features of campylobacter jejuni infections. *J. Infect. Dis.* **176**, S103–S105 (1997).
- 407 **3.** Tam, C. C. & O'Brien, S. J. Economic cost of campylobacter, norovirus and rotavirus disease in the united kingdom. *PloS*  
408 *one* **11**, e0138526 (2016).
- 409 **4.** EFSA Panel on Biological Hazards (BIOHAZ). Scientific opinion on campylobacter in broiler meat production: control  
410 options and performance objectives and/or targets at different stages of the food chain. *EFSA J.* **9**, 2105 (2011).
- 411 **5.** Jorgensen F, Madden RH, Arnold E, Charlett A, Elviss NC. Fsa project fs241044 - survey report - a microbiological survey  
412 of campylobacter contamination in fresh whole uk produced chilled chickens at retail sale (2014-15) (2015).
- 413 **6.** Heyndrickx, M. *et al.* Routes for salmonella contamination of poultry meat: epidemiological study from hatchery to  
414 slaughterhouse. *Epidemiol. & Infect.* **129**, 253–265 (2002).
- 415 **7.** Powell, L. *et al.* The prevalence of campylobacter spp. in broiler flocks and on broiler carcasses, and the risks associated  
416 with highly contaminated carcasses. *Epidemiol. & Infect.* **140**, 2233–2246 (2012).
- 417 **8.** Evans, S. & Sayers, A. A longitudinal study of campylobacter infection of broiler flocks in great britain. *Prev. Vet.*  
418 *Medicine* **46**, 209–223 (2000).
- 419 **9.** FSA. The joint government and industry target to reduce campylobacter in uk produced chickens by 2015 (2010).
- 420 **10.** Newell, D. *et al.* Biosecurity-based interventions and strategies to reduce campylobacter spp. on poultry farms. *Appl.*  
421 *environmental microbiology* **77**, 8605–8614 (2011).

- 422 **11.** Sibanda, N. *et al.* A review of the effect of management practices on campylobacter prevalence in poultry farms. *Front.*  
423 *microbiology* **9**, 2002 (2018).
- 424 **12.** Stern, N. J., Cox, N. A., Musgrove, M. T. & Park, C. Incidence and levels of campylobacter in broilers after exposure to an  
425 inoculated seeder bird. *J. Appl. Poult. Res.* **10**, 315–318 (2001).
- 426 **13.** Hermans, D. *et al.* Campylobacter control in poultry by current intervention measures ineffective: urgent need for  
427 intensified fundamental research. *Vet. Microbiol.* **152**, 219–228 (2011).
- 428 **14.** Wales, A. D., Vidal, A. B., Davies, R. H. & Rodgers, J. D. Field interventions against colonization of broilers by  
429 campylobacter. *Compr. Rev. Food Sci. Food Saf.* **18**, 167–188 (2019).
- 430 **15.** Fraser, R. W., Williams, N., Powell, L. & Cook, A. Reducing campylobacter and salmonella infection: two studies of the  
431 economic cost and attitude to adoption of on-farm biosecurity measures. *Zoonoses Public Heal.* **57**, e109–e115 (2010).
- 432 **16.** Kretzschmar, M. Disease modeling for public health: added value, challenges, and institutional constraints. *J. public*  
433 *health policy* **41**, 39–51 (2020).
- 434 **17.** Dingle, K. *et al.* Multilocus sequence typing system for campylobacter jejuni. *J. clinical microbiology* **39**, 14–23 (2001).
- 435 **18.** Maiden, M. C. *et al.* Mlst revisited: the gene-by-gene approach to bacterial genomics. *Nat. Rev. Microbiol.* **11**, 728–736  
436 (2013).
- 437 **19.** Council of European Union. Commission regulation (ec) no 889/2008 of 5 september 2008 laying down detailed rules for  
438 the implementation of council regulation (ec) no 834/2007 on organic production and labelling of organic products with  
439 regard to organic production, labelling and control (2008).  
440 <https://eur-lex.europa.eu/legal-content/EN/TXT/?uri=CELEX%3A02008R0889-20210101>.
- 441 **20.** Lydekaitienė, V. L. & Kudirkienė, E. Prevalence and genetic diversity of c. jejuni isolated from broilers and their  
442 environment using flaa-rflp typing and mlst analysis. *Annals Animal Sci.* **1** (2020).
- 443 **21.** Colles, F., Jones, K., Harding, R. & Maiden, M. Genetic diversity of campylobacter jejuni isolates from farm animals and  
444 the farm environment. *Appl. Environ. Microbiol.* **69**, 7409–7413 (2003).
- 445 **22.** Wiczorek, K., Wołkowicz, T. & Osek, J. Mlst-based genetic relatedness of campylobacter jejuni isolated from chickens  
446 and humans in poland. *Plos one* **15**, e0226238 (2020).
- 447 **23.** Hofreuter, D. *et al.* Unique features of a highly pathogenic campylobacter jejuni strain. *Infect. immunity* **74**, 4694–4707  
448 (2006).
- 449 **24.** Hu, L. & Kopecko, D. J. Campylobacter jejuni 81-176 associates with microtubules and dynein during invasion of human  
450 intestinal cells. *Infect. Immun.* **67**, 4171–4182 (1999).
- 451 **25.** Chen, H.-C. & Stern, N. J. Competitive exclusion of heterologous campylobacter spp. in chicks. *Appl. Environ. Microbiol.*  
452 **67**, 848–851 (2001).

- 453 **26.** Nothaft, H. *et al.* Engineering the campylobacter jejuni n-glycan to create an effective chicken vaccine. *Sci. reports* **6**,  
454 1–12 (2016).
- 455 **27.** Meunier, M. *et al.* Promising new vaccine candidates against campylobacter in broilers. *PloS one* **12**, e0188472 (2017).
- 456 **28.** Coward, C. *et al.* Competing isogenic campylobacter strains exhibit variable population structures in vivo. *Appl.*  
457 *environmental microbiology* **74**, 3857–3867 (2008).
- 458 **29.** Adkin, A., Hartnett, E., Jordan, L., Newell, D. & Davison, H. Use of a systematic review to assist the development of  
459 campylobacter control strategies in broilers. *J. Appl. Microbiol.* **100**, 306–315 (2006).
- 460 **30.** Cox, N. *et al.* Evidence for horizontal and vertical transmission in campylobacter passage from hen to her progeny. *J. food*  
461 *protection* **75**, 1896–1902 (2012).
- 462 **31.** Colles, F. M. *et al.* Campylobacter infection of broiler chickens in a free-range environment. *Environ. Microbiol.* **10**,  
463 2042–2050 (2008).
- 464 **32.** Colles, F. M. *et al.* Parallel sequencing of pora reveals a complex pattern of campylobacter genotypes that differs between  
465 broiler and broiler breeder chickens. *Sci. reports* **9**, 1–13 (2019).
- 466 **33.** Rawson, T., Dawkins, M. S. & Bonsall, M. B. A mathematical model of campylobacter dynamics within a broiler flock.  
467 *Front. Microbiol.* **10**, 1940, DOI: [10.3389/fmicb.2019.01940](https://doi.org/10.3389/fmicb.2019.01940) (2019).
- 468 **34.** Leibold, M. A. *et al.* The metacommunity concept: a framework for multi-scale community ecology. *Ecol. letters* **7**,  
469 601–613 (2004).
- 470 **35.** Colles, F. M., McCarthy, N. D., Bliss, C. M., Layton, R. & Maiden, M. C. The long-term dynamics of campylobacter  
471 colonizing a free-range broiler breeder flock: an observational study. *Environ. Microbiol.* **17**, 938–946 (2015).
- 472 **36.** Ulrich, W., Soliveres, S., Kryszewski, W., Maestre, F. T. & Gotelli, N. J. Matrix models for quantifying competitive  
473 intransitivity from species abundance data. *Oikos* **123**, 1057–1070 (2014).
- 474 **37.** Soliveres, S. & Allan, E. Everything you always wanted to know about intransitive competition but were afraid to ask. *J.*  
475 *Ecol.* **106**, 807–814 (2018).
- 476 **38.** Laird, R. A. & Schamp, B. S. Competitive intransitivity promotes species coexistence. *The Am. Nat.* **168**, 182–193 (2006).
- 477 **39.** Grilli, J., Barabás, G., Michalska-Smith, M. J. & Allesina, S. Higher-order interactions stabilize dynamics in competitive  
478 network models. *Nature* **548**, 210–213 (2017).
- 479 **40.** Hibbing, M. E., Fuqua, C., Parsek, M. R. & Peterson, S. B. Bacterial competition: surviving and thriving in the microbial  
480 jungle. *Nat. reviews microbiology* **8**, 15–25 (2010).
- 481 **41.** Sutherland, C., Elston, D. & Lambin, X. A demographic, spatially explicit patch occupancy model of metapopulation  
482 dynamics and persistence. *Ecology* **95**, 3149–3160 (2014).

- 483 **42.** May, R. M. & Nowak, M. A. Superinfection, metapopulation dynamics, and the evolution of diversity. *J. Theor. Biol.* **170**,  
484 95–114 (1994).
- 485 **43.** Hanski, I. & Gyllenberg, M. Uniting two general patterns in the distribution of species. *Science* **275**, 397–400 (1997).
- 486 **44.** Plummer, M. Jags: A program for analysis of Bayesian graphical models using Gibbs sampling. Available at: [http:](http://mcmc-jags.sourceforge.net/)  
487 [//mcmc-jags.sourceforge.net/](http://mcmc-jags.sourceforge.net/) (2007).
- 488 **45.** Plummer, M., Stukalov, A. & Denwood, M. rjags: Bayesian graphical models using MCMC. Available at: [http:](http://CRAN.R-project.org/package=rjags)  
489 [//CRAN.R-project.org/package=rjags](http://CRAN.R-project.org/package=rjags). R package version (2016).
- 490 **46.** Feng, Y. *et al.* Inferring competitive outcomes, ranks and intransitivity from empirical data: A comparison of different  
491 methods. *Methods Ecol. Evol.* **11**, 117–128 (2020).
- 492 **47.** Kendall, M. G. & Smith, B. B. On the method of paired comparisons. *Biometrika* **31**, 324–345 (1940).
- 493 **48.** Gallien, L., Zimmermann, N. E., Levine, J. M. & Adler, P. B. The effects of intransitive competition on coexistence. *Ecol.*  
494 *Lett.* **20**, 791–800 (2017).
- 495 **49.** Soliveres, S. *et al.* Intransitive competition is widespread in plant communities and maintains their species richness. *Ecol.*  
496 *letters* **18**, 790–798 (2015).
- 497 **50.** Soliveres, S. *et al.* Intransitive competition is common across five major taxonomic groups and is driven by productivity,  
498 competitive rank and functional traits. *J. Ecol.* **106**, 852–864 (2018).
- 499 **51.** El-Shibiny, A., Connerton, P. & Connerton, I. Campylobacter succession in broiler chickens. *Vet. Microbiol.* **125**, 323–332  
500 (2007).
- 501 **52.** Hanski, I. & Ovaskainen, O. Metapopulation theory for fragmented landscapes. *Theor. population biology* **64**, 119–127  
502 (2003).
- 503 **53.** Bonsall, M. B., Jansen, V. A. & Hassell, M. P. Life history trade-offs assemble ecological guilds. *Science* **306**, 111–114  
504 (2004).
- 505 **54.** Scheffer, M. & van Nes, E. H. Self-organized similarity, the evolutionary emergence of groups of similar species. *Proc.*  
506 *Natl. Acad. Sci.* **103**, 6230–6235 (2006).
- 507 **55.** Poniatoski, D., Stuhldreher, G., Löffler, F. & Fartmann, T. Patch occupancy of grassland specialists: Habitat quality  
508 matters more than habitat connectivity. *Biol. Conserv.* **225**, 237–244 (2018).
- 509 **56.** Donahue, M. J., Holyoak, M. & Feng, C. Patterns of dispersal and dynamics among habitat patches varying in quality. *The*  
510 *Am. Nat.* **162**, 302–317 (2003).
- 511 **57.** Yu, D. W. & Wilson, H. B. The competition-colonization trade-off is dead; long live the competition-colonization trade-off.  
512 *The Am. Nat.* **158**, 49–63 (2001).

- 513 **58.** Rawson, T. *et al.* A mathematical modeling approach to uncover factors influencing the spread of campylobacter in a flock  
514 of broiler-breeder chickens. *Front. Microbiol.* **11**, 2481 (2020).
- 515 **59.** Guardia, S. *et al.* Effects of stocking density on the growth performance and digestive microbiota of broiler chickens. *Poult.*  
516 *Sci.* **90**, 1878–1889 (2011).
- 517 **60.** Gomes, A. *et al.* Overcrowding stress decreases macrophage activity and increases salmonella enteritidis invasion in broiler  
518 chickens. *Avian Pathol.* **43**, 82–90 (2014).
- 519 **61.** Burkholder, K., Thompson, K., Einstein, M., Applegate, T. & Patterson, J. Influence of stressors on normal intestinal  
520 microbiota, intestinal morphology, and susceptibility to salmonella enteritidis colonization in broilers. *Poult. Sci.* **87**,  
521 1734–1741 (2008).
- 522 **62.** Jore, S. *et al.* Trends in campylobacter incidence in broilers and humans in six european countries, 1997–2007. *Prev.*  
523 *veterinary medicine* **93**, 33–41 (2010).
- 524 **63.** Patrick, M. E. *et al.* Effects of climate on incidence of campylobacter spp. in humans and prevalence in broiler flocks in  
525 denmark. *Appl. Environ. Microbiol.* **70**, 7474–7480 (2004).
- 526 **64.** Leeson, S. & Summers, J. D. *Broiler breeder production* (Nottingham University Press, 2010).
- 527 **65.** Cox, N. *et al.* Prevalence and level of campylobacter in commercial broiler breeders (parents) and broilers. *J. applied*  
528 *poultry research* **11**, 187–190 (2002).
- 529 **66.** Gözl, G. *et al.* Relevance of campylobacter to public health—the need for a one health approach. *Int. J. Med. Microbiol.*  
530 **304**, 817–823 (2014).

## 531 A Appendices

### 532 A.1 Appendix 1 - Patch-occupancy model pseudo-code

#### Algorithm 1: Patch-occupancy model pseudo code

```
1 Initialise chickens with STs in proportion to very first timestep in experimental data.
2 for every timestep do
3   Prepare placeholder vector for current timestep, equal to previous timestep.
4   for every chicken do
5     if chicken currently colonised then
6       Record currently occupying ST  $s$ .
7       Draw random number  $x$  from uniform distribution  $U(0, 1)$ .
8       if  $x < \mu_s$  then
9         Remove ST  $s$  from chicken in placeholder vector.
10      else
11        ST  $s$  will challenge other chickens:
12        Draw random number  $y$  from  $\text{Pois}(\lambda_s)$ .
13        Add  $y$  to a running tally,  $Y_s$ , of how many other chickens will be challenged by ST  $s$ .
14      end
15    end
16  end
17 end
18 for every ST,  $s$  do
19   for  $j \leftarrow 1$  to  $Y_s$  do
20     Randomly select a chicken,  $c$ , to be challenged by ST  $s$ .
21     if  $c$  not colonised then
22       Chicken  $c$  is now colonised by ST  $s$  in placeholder vector.
23     else
24       Record currently occupying ST,  $r$ .
25       Draw a random number  $z$  from uniform distribution  $U(0, 1)$ .
26       if  $z < C_{s,r}$  then
27         ST  $s$  replaces ST  $r$  in placeholder vector.
28       else
29         ST  $r$  remains in chicken  $c$  in placeholder vector.
30       end
31     end
32   end
33 end
34 end
35 end
36 Placeholder vector is assigned as frequency vector for current timestep. Move to subsequent timestep.
37 end
```
